# Supplementary material for: How Reliable Are Predictions of CD8+ T Cell Epitope Recognition? Lessons for Cancer
Source: MDPI journal article supplement (doi:10.3390/onco4020006), 2024-04-17
Supplement: s1 [file s1]

## Supplementary (S) Figures

Figure S1a

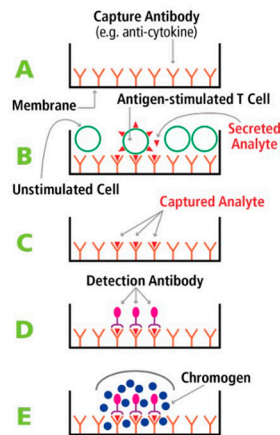

Figure S1b

Typical T cell ImmunoSpot well (IFN $\gamma$ )

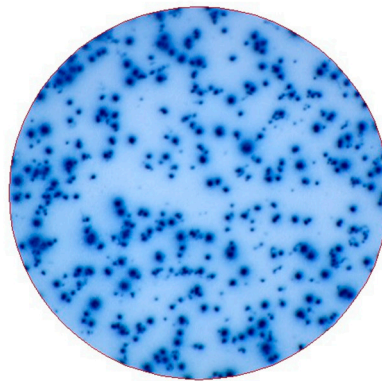

Figure S1c

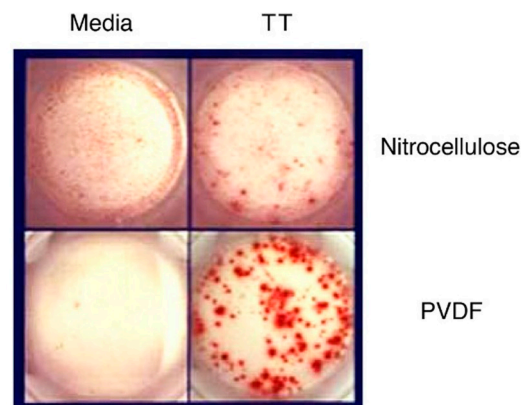

### Figure S1. Principle of the T cell ImmunoSpot® assay

a. A schematic of the ELISPOT assay. PVDF-membrane plates are coated with anti-cytokine capture antibody. PBMCs are added with stimuli and incubated for 20 hours. Cells are washed off and captured cytokine is detected with a complementary anti-cytokine antibody conjugated to an enzyme. Excess is washed off and the enzyme caused chromogen precipitation in the location of a secreting cell in the form of a distinct spot.

b. A typical well showing approximately 200 spots representing T cells secreting IFN $\gamma$  in response to stimulation with CMV peptide pool.

c. A comparison of membranes Nitrocellulose and PVDF, showing distinct spots with the latter (4).

Figure S2a

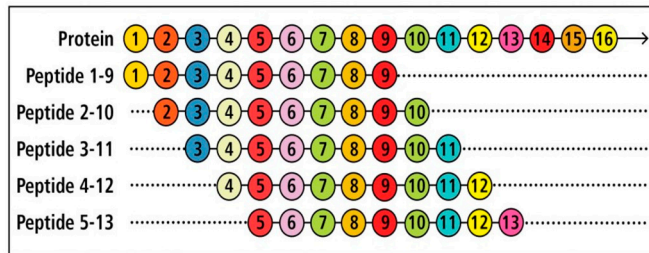

Figure S2b

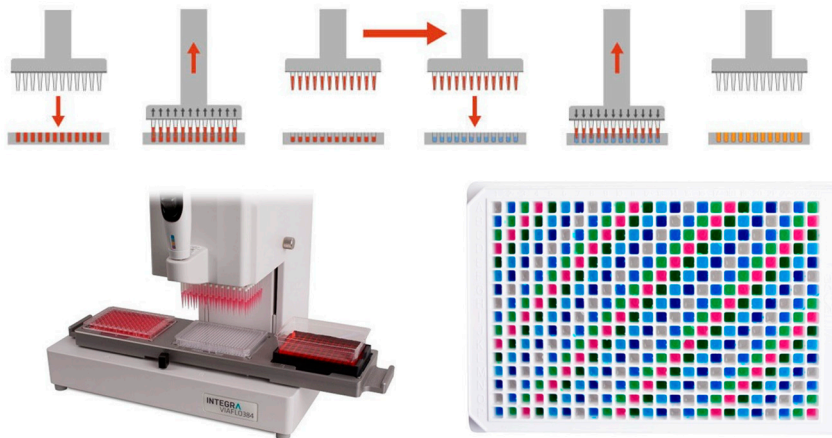

**Figure S2. Strategy for comprehensive epitope mapping**

a. Peptide design schematic with consecutive peptides moving down the protein sequence one amino acid at a time (10). b. Automated plating of peptides can be carried out where the robot-controlled pipette picks up peptides from a reservoir and then deposits them into a 384-well ELISPOT plate.

Figure S3a

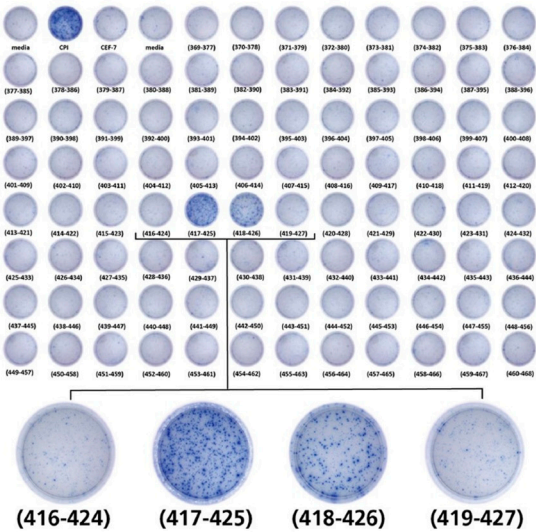

Figure S3b

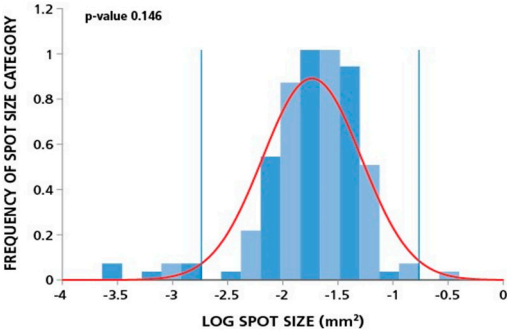

Figure S3c

|                                                              |                      |      |                               |
|--------------------------------------------------------------|----------------------|------|-------------------------------|
| Negative Controls and Cut Off Values For Response Categories | $\bar{x}$            | n=18 | Cryptic epitopes (99.7% conf) |
|                                                              | $\sigma$             |      |                               |
|                                                              | $\bar{x} * 3\sigma$  |      |                               |
|                                                              | $\bar{x} * 5\sigma$  |      | Subdominant epitopes          |
|                                                              | $\bar{x} * 10\sigma$ |      | Dominant epitopes             |
|                                                              | >100 SFU             |      | Super-dominant epitopes       |

Figure S3. Analysis of raw data

a. An example of an image of an entire plate where responses against HCMV peptides are being investigated. 4 wells are zoomed in upon. b. Spot size distribution showing the position of vertical gates for counting spots (11). c. Classification of positive results to peptides based on the number of spots above the negative control (12).

Figure S4a

| Peptide Name     | Sequence  | Individual Subject CDR3 T Cell Response (SFU per 50,000 PBMC) |         |         |         |         |         |         |         |         |         |
|------------------|-----------|---------------------------------------------------------------|---------|---------|---------|---------|---------|---------|---------|---------|---------|
|                  |           | D0-1                                                          | D0-2    | D0-3    | D0-4    | D0-5    | D0-6    | D0-7    | D0-8    | D0-9    | D0-10   |
| pep01-018-026    | GGHLLVAV  | 0                                                             | 2       | 2       | 0       | 7       | 1       | 72      | 11      | 0       | 6       |
| pep01-020-038    | GGPVLNNE  | 0                                                             | 2       | 3       | 1       | 2       | 2       | 5       | 8       | 1       | 12      |
| pep01-065-073    | STPCHRSN  | 16                                                            | 0       | 0       | 44      | 0       | 1       | 1       | 5       | 0       | 1       |
| pep01-070-078    | RHCHGCHD  | 2                                                             | 0       | 2       | 2       | 0       | 2       | 86      | 22      | 2       | 2       |
| pep01-085-103    | HNPFERSK  | 13                                                            | 0       | 20      | 0       | 0       | 1       | 2       | 10      | 1       | 1       |
| pep01-097-105    | PTSGSKPS  | 0                                                             | 0       | 41      | 1       | 21      | 0       | 9       | 5       | 0       | 2       |
| pep01-110-121    | CPGSPFAG  | 15                                                            | 0       | 6       | 2       | 1       | 0       | 5       | 11      | 2       | 7       |
| pep01-106-114    | GPMSGVVY  | 14                                                            | 0       | 16      | 5       | 0       | 0       | 2       | 13      | 1       | 3       |
| pep01-107-108    | LPMSGYTA  | 0                                                             | 0       | 17      | 2       | 2       | 0       | 2       | 1       | 1       | 1       |
| pep01-114-121    | VALPMLN   | 22                                                            | 1       | 7       | 0       | 3       | 2       | 28      | 14      | 0       | 3       |
| pep01-115-123    | ALPMLN    | 11                                                            | 0       | 5       | 7       | 2       | 0       | 6       | 22      | 6       | 2       |
| pep01-116-124    | LPMLNAP   | 71                                                            | 0       | 7       | 14      | 2       | 3       | 5       | 18      | 5       | 2       |
| pep01-119-127    | RMALPSPN  | 1                                                             | 0       | 6       | 10      | 2       | 1       | 21      | 10      | 0       | 0       |
| pep01-119-148    | HRALPADA  | 13                                                            | 1       | 1       | 16      | 1       | 1       | 6       | 9       | 5       | 1       |
| pep01-141-149    | MLPNDAM   | 7                                                             | 0       | 1       | 0       | 28      | 0       | 5       | 8       | 0       | 3       |
| pep01-142-150    | LPNDAMN   | 11                                                            | 0       | 2       | 10      | 0       | 0       | 6       | 10      | 1       | 1       |
| pep01-146-151    | VALNDAMN  | 1                                                             | 2       | 5       | 0       | 44      | 1       | 2       | 1       | 1       | 6       |
| pep01-149-157    | HAAGSGMAW | 0                                                             | 0       | 16      | 1       | 2       | 0       | 1       | 2       | 2       | 2       |
| pep01-151-158    | ASGSGMAW  | 20                                                            | 0       | 2       | 3       | 0       | 1       | 7       | 6       | 1       | 0       |
| pep01-153-160    | SGSGMNGAQ | 23                                                            | 0       | 9       | 7       | 0       | 1       | 10      | 9       | 3       | 1       |
| pep01-159-163    | QHPGKATV  | 1                                                             | 1       | 7       | 1       | 10      | 2       | 10      | 13      | 0       | 0       |
| pep01-175-183    | WKEPQVYIT | 1                                                             | 0       | 2       | 0       | 10      | 0       | 1       | 7       | 0       | 1       |
| pep01-188-196    | IFFPQVLA  | 1                                                             | 1       | 5       | 6       | 1       | 1       | 3       | 13      | 1       | 1       |
| pep01-205-211    | ELCHAMET  | 0                                                             | 0       | 0       | 2       | 1       | 1       | 21      | 3       | 7       | 1       |
| pep01-208-216    | MENTATAM  | 1                                                             | 1       | 71      | 7       | 5       | 1       | 0       | 14      | 11      | 3       |
| pep01-213-219    | QGVFVLE   | 1                                                             | 1       | 7       | 1       | 76      | 0       | 0       | 10      | 0       | 0       |
| pep01-228-236    | LESCDVP   | 0                                                             | 0       | 2       | 6       | 10      | 1       | 1       | 2       | 0       | 0       |
| pep01-250-258    | VEELTMTN  | 3                                                             | 0       | 3       | 6       | 13      | 3       | 2       | 2       | 2       | 1       |
| pep01-251-259    | EEELTMTN  | 0                                                             | 1       | 1       | 2       | 1       | 2       | 10      | 1       | 1       | 2       |
| pep01-262-270    | PSMRPHEIN | 0                                                             | 1       | 10      | 5       | 0       | 2       | 6       | 3       | 9       | 1       |
| pep01-267-275    | HEMGPTA   | 0                                                             | 0       | 3       | 0       | 0       | 0       | 6       | 2       | 0       | 0       |
| pep01-270-278    | NSGFVLPK  | 0                                                             | 2       | 10      | 0       | 1       | 0       | 5       | 9       | 7       | 10      |
| pep01-273-281    | TVLCRNMI  | 1                                                             | 0       | 9       | 62      | 0       | 2       | 7       | 2       | 3       | 2       |
| pep01-284-292    | PIGSGHNL  | 11                                                            | 0       | 0       | 11      | 2       | 7       | 6       | 7       | 10      | 18      |
| pep01-300-308    | LAHNGDPL  | 14                                                            | 2       | 10      | 17      | 1       | 0       | 21      | 2       | 1       | 21      |
| pep01-324-332    | QGVFLVCA  | 44                                                            | 0       | 5       | 3       | 3       | 0       | 6       | 5       | 1       | 0       |
| pep01-325-333    | QFLVGLA   | 14                                                            | 1       | 6       | 16      | 5       | 1       | 13      | 0       | 7       | 7       |
| pep01-328-336    | LEVGNMET  | 0                                                             | 0       | 1       | 7       | 1       | 1       | 7       | 10      | 5       | 21      |
| pep01-390-398    | ISAGAGDSD | 0                                                             | 0       | 5       | 56      | 0       | 0       | 7       | 13      | 2       | 6       |
| pep01-395-403    | GDQDWMYS  | 2                                                             | 0       | 3       | 10      | 0       | 0       | 14      | 8       | 1       | 2       |
| pep01-413-425    | PRVYSSGA  | 0                                                             | 0       | 3       | 32      | 0       | 1       | 10      | 2       | 10      | 2       |
| pep01-418-426    | PRVYSSAM  | 1                                                             | 0       | 6       | 6       | 0       | 0       | 6       | 11      | 10      | 0       |
| pep01-430-438    | ITAGSRNK  | 3                                                             | 1       | 0       | 89      | 1       | 0       | 11      | 18      | 11      | 7       |
| pep01-431-439    | TSAGSRNS  | 0                                                             | 0       | 8       | 9       | 0       | 1       | 16      | 17      | 1       | 2       |
| pep01-465-473    | EEETDESD  | 0                                                             | 1       | 11      | 54      | 1       | 1       | 5       | 6       | 7       | 7       |
| pep01-482-490    | PTNPFVCAQ | 0                                                             | 21      | 1       | 14      | 1       | 1       | 5       | 1       | 10      | 3       |
| pep01-482-500    | LARKLVNAV | 21                                                            | 2       | 5       | 6       | 0       | 0       | 2       | 1       | 5       | 0       |
| pep01-505-513    | LVGRNAVY  | 40                                                            | 2       | 1       | 10      | 37      | 1       | 1       | 1       | 14      | 10      |
| pep01-510-511    | VQGVNAVY  | 2                                                             | 1       | 1       | 1       | 0       | 1       | 5       | 3       | 1       | 1       |
| pep01-511-519    | GFYWDAND  | 2                                                             | 1       | 6       | 9       | 0       | 0       | 8       | 17      | 1       | 8       |
| pep01-512-520    | FFYWDAND  | 0                                                             | 28      | 5       | 10      | 1       | 1       | 8       | 13      | 17      | 11      |
| pep01-513-521    | FFYWDANDY | 1                                                             | 25      | 5       | 6       | 0       | 1       | 2       | 8       | 8       | 100     |
| pep01-514-522    | FWWDANDN  | 0                                                             | 2       | 1       | 0       | 1       | 10      | 13      | 10      | 10      | 44      |
| pep01-521-529    | WRFALSS   | 2                                                             | 1       | 80      | 5       | 0       | 0       | 10      | 7       | 1       | 5       |
| pep01-524-532    | PAELVYVWL | 2                                                             | 16      | 6       | 8       | 1       | 7       | 14      | 8       | 11      | 6       |
| pep01-544-552    | QNALPQVQ  | 2                                                             | 6       | 5       | 3       | 13      | 5       | 13      | 5       | 2       | 2       |
| Negative         |           | 2                                                             | 1.0     | 0.8     | 4.2     | 3.9     | 3.9     | 1.8     | 6.5     | 8.4     | 1.2     |
| Controls and Cut |           | 1.0                                                           | 1.2     | 1.6     | 4.4     | 6.8     | 2.4     | 1.8     | 1.8     | 1.7     | 2.7     |
| Off Values For   |           | 8% $\sigma$                                                   | 3.9     | 4.6     | 14.9    | 17.1    | 5.5     | 8.8     | 23.3    | 25.3    | 11.3    |
| Response         |           | 8% $\sigma$                                                   | 5.8     | 7.2     | 22.1    | 25.9    | 6.5     | 13.5    | 34.4    | 36.3    | 16.8    |
| Categories       |           | 10% $\sigma$                                                  | 10.7    | 13.7    | 40.0    | 47.8    | 9.1     | 25.3    | 62.4    | 64.2    | 30.3    |
|                  |           | 2-100 SFU                                                     | >100SFU |

Figure S4b

| Ref.                 | Peptides Tested |                  |                          |           | Individual Subjects' CD8+ T Cell Response (SFU per 300,000 PMAC) |      |      |      |      |      |      |      |      |       |
|----------------------|-----------------|------------------|--------------------------|-----------|------------------------------------------------------------------|------|------|------|------|------|------|------|------|-------|
|                      | Peptide Name    | Epitope Sequence | Percentile Binding Score | pp65 Rank | ID 1                                                             | ID 2 | ID 3 | ID 4 | ID 5 | ID 6 | ID 7 | ID 8 | ID 9 | ID 10 |
| 42,43,44,45          | pp65-495-503    | NLVPMVATV        | 0.06                     | 1         | 60                                                               | 303  | 1    | 100  | 97   | 148  | 287  | 274  | 14   | 318   |
| 33                   | pp65-340-348    | RQYDPVAAL        | 0.06                     | 2         | 6                                                                | 7    | 5    | 6    | 0    | 2    | 1    | 2    | 5    | 21    |
| 30,37                | pp65-040-048    | RLIGTGHV         | 0.09                     | 3         | 0                                                                | 1    | 2    | 7    | 3    | 0    | 5    | 13   | 2    | 1     |
| 30,36,37,38,39       | pp65-522-530    | RFAELGV          | 0.11                     | 5         | 5                                                                | 6    | 0    | 9    | 0    | 8    | 5    | 11   | 8    | 10    |
| 31,37                | pp65-320-328    | LMNGQGFL         | 0.15                     | 4         | 14                                                               | 2    | 10   | 17   | 1    | 0    | 21   | 2    | 1    | 21    |
| 38                   | pp65-218-226    | VIGDQYKV         | 0.23                     | 7         | 0                                                                | 0    | 10   | 3    | 2    | 1    | 6    | 5    | 17   | 1     |
| 31,32                | pp65-155-163    | QMWDQRLTV        | 0.24                     | 6         | 1                                                                | 1    | 7    | 1    | 10   | 2    | 13   | 13   | 5    | 0     |
| 48,41                | pp65-014-022    | VLGPGSHV         | 0.24                     | 9         | 1                                                                | 1    | 10   | 3    | 5    | 0    | 3    | 24   | 8    | 8     |
| 30,34,37,48,41,46,47 | pp65-120-128    | MLNPISNV         | 0.25                     | 11        | 8                                                                | 0    | 5    | 2    | 2    | 0    | 9    | 15   | 3    | 8     |
| 33                   | pp65-347-355    | ALFFFDL          | 0.54                     | 12        | 0                                                                | 0    | 8    | 23   | 0    | 0    | 3    | 14   | 1    | 3     |
| 37                   | pp65-491-499    | IAANNVPM         | 0.74                     | 13        | 1                                                                | 0    | 5    | 2    | 1    | 2    | 7    | 2    | 7    | 3     |
| 30                   | pp65-425-433    | AMAGATSA         | 0.85                     | 15        | 2                                                                | 0    | 5    | 2    | 1    | 1    | 8    | 7    | 1    | 2     |
| 34                   | pp65-042-050    | LQIGHVRV         | 0.98                     | 21        | 1                                                                | 0    | 6    | 18   | 3    | 0    | 5    | 2    | 5    | 10    |
| 38                   | pp65-054-062    | SILVSRIT         | 1.5                      | 23        | 1                                                                | 0    | 1    | 6    | 3    | 1    | 5    | 5    | 0    | 3     |
| 22                   | pp65-325-333    | QIFLEQAI         | 1.6                      | 27        | 3                                                                | 1    | 6    | 16   | 5    | 1    | 1    | 13   | 0    | 7     |
| 30                   | pp65-312-320    | GLISGNLL         | 1.9                      | 26        | 5                                                                | 0    | 9    | 5    | 0    | 2    | 5    | 6    | 5    | 2     |
| 30                   | pp65-110-118    | SIYYVALPL        | 2.2                      | 28        | 8                                                                | 0    | 5    | 9    | 0    | 0    | 1    | 18   | 3    | 13    |
| 38                   | pp65-227-235    | YLSEFQDV         | 2.6                      | 32        | 0                                                                | 0    | 1    | 2    | 1    | 2    | 22   | 7    | 5    | 2     |
| 34,35                | pp65-341-349    | QYDPVAALF        | 3.3                      | 36        | 1                                                                | 9    | 9    | 28   | 0    | 0    | 1    | 9    | 1    | 2     |
| 22                   | pp65-324-332    | QQIFLEVQA        | 4                        | 43        | 341                                                              | 0    | 5    | 3    | 3    | 0    | 6    | 5    | 1    | 8     |
| 30                   | pp65-519-527    | DTYRIIAEL        | 4.3                      | 49        | 1                                                                | 0    | 7    | 0    | 2    | 1    | 14   | 3    | 1    | 1     |
| 22                   | pp65-141-149    | HLPVADAVI        | 5.1                      | 54        | 7                                                                | 0    | 1    | 0    | 26   | 0    | 5    | 8    | 0    | 3     |
| 22                   | pp65-144-152    | VADAVIHAS        | 11                       | 80        | 1                                                                | 2    | 5    | 0    | 44   | 1    | 2    | 3    | 3    | 6     |
| 38                   | pp65-509-517    | KYGEFFWDA        | 12                       | 92        | 0                                                                | 2    | 2    | 2    | 0    | 3    | 11   | 2    | 2    | 7     |
| 33                   | pp65-345-353    | VALFFFDI         | 16                       | 97        | 0                                                                | 6    | 2    | 23   | 0    | 0    | 8    | 3    | 2    | 5     |
| 22                   | pp65-203-211    | ELVCSMENT        | 23                       | 163       | 0                                                                | 0    | 0    | 2    | 1    | 1    | 21   | 3    | 7    | 1     |
| 22                   | pp65-221-229    | DDYKVYLE         | 25                       | 229       | 1                                                                | 1    | 7    | 1    | 76   | 0    | 0    | 10   | 6    | 0     |
| 22                   | pp65-116-124    | LPLKMLNP         | 51                       | 360       | 71                                                               | 0    | 7    | 14   | 2    | 3    | 5    | 18   | 5    | 2     |
| 22                   | pp65-417-425    | TPRYTGGA         | 63                       | 378       | 0                                                                | 0    | 3    | 32   | 0    | 1    | 10   | 2    | 154  | 2     |
| 22                   | pp65-418-426    | PRVTGGGAM        | 73                       | 394       | 1                                                                | 0    | 6    | 6    | 0    | 0    | 6    | 11   | 102  | 0     |
| 22                   | pp65-097-105    | PTGRSKIPS        | 78                       | 510       | 0                                                                | 0    | 41   | 1    | 21   | 0    | 9    | 5    | 0    | 2     |

Figure S4c

|                           |  | Test Subjects' CD8+ T Cells Specific for Epitopes |       |       |        |       |       |       |       |       |       |
|---------------------------|--|---------------------------------------------------|-------|-------|--------|-------|-------|-------|-------|-------|-------|
|                           |  | ID 1                                              | ID 2  | ID 3  | ID 4   | ID 5  | ID 6  | ID 7  | ID 8  | ID 9  | ID 10 |
| Cryptic Epitopes          |  |                                                   |       |       |        |       |       |       |       |       |       |
| Number                    |  | 11                                                | 23    | 32    | 24     | 6     | 2     | 14    | 3     | 8     | 21    |
| Cum. SFU                  |  | 12.10                                             | 18.67 | 67.15 | 92.50  | 3.04  | 0.39  | 58.40 | 11.53 | 21.57 | 56.12 |
| % of total SFU            |  | 1.02%                                             | 4.41% | 3.02% | 13.54% | 0.73% | 0.24% | 4.03% | 1.04% | 2.89% | 5.09% |
| Subdominant Epitopes      |  |                                                   |       |       |        |       |       |       |       |       |       |
| Number                    |  | 14                                                | 8     | 5     | 17     | 6     | 2     | 6     | 0     | 1     | 16    |
| Cum. SFU                  |  | 45                                                | 35    | 63    | 230    | 14    | 21    | 194   | 0     | 7     | 132   |
| % of total SFU            |  | 4%                                                | 8%    | 3%    | 34%    | 3%    | 13%   | 13%   | 0%    | 1%    | 12%   |
| Dominant Epitopes         |  |                                                   |       |       |        |       |       |       |       |       |       |
| Number                    |  | 15                                                | 4     | 3     | 4      | 9     | 0     | 3     | 1     | 0     | 5     |
| Cum. SFU                  |  | 281                                               | 72    | 147   | 193    | 263   | 0     | 178   | 73    | 0     | 221   |
| % of total SFU            |  | 24%                                               | 17%   | 7%    | 28%    | 63%   | 0%    | 12%   | 7%    | 0%    | 20%   |
| Super Dominant Epitopes   |  |                                                   |       |       |        |       |       |       |       |       |       |
| Number                    |  | 3                                                 | 1     | 4     | 2      | 1     | 1     | 3     | 2     | 2     | 3     |
| Cum. SFU                  |  | 847                                               | 298   | 1948  | 168    | 139   | 139   | 1019  | 1027  | 717   | 694   |
| % of total SFU            |  | 71%                                               | 70%   | 88%   | 25%    | 33%   | 86%   | 70%   | 92%   | 96%   | 63%   |
| Total Epitopes Recognized |  | 43                                                | 36    | 44    | 47     | 22    | 5     | 26    | 6     | 11    | 45    |
| Cumulative Spec. SFU      |  | 1185                                              | 424   | 2226  | 683    | 418   | 161   | 1450  | 1111  | 746   | 1103  |

Figure S4d

| Peptide Pools  | HCMV-seropositive donors |         |         |         |          |          | HCMV-seronegative donors |          |         |         |          |         |
|----------------|--------------------------|---------|---------|---------|----------|----------|--------------------------|----------|---------|---------|----------|---------|
|                | Donor 29                 | Donor 1 | Donor 4 | Donor 7 | Donor 10 | Donor 11 | Donor 19                 | Donor 28 | Donor 5 | Donor 6 | Donor 21 | Donor 9 |
| Media          | 11*                      | 2       | 8       | 19      | 0        | 1        | 3                        | 2        | 3       | 1       | 7        | 0       |
| HE-1(120)      | 35                       | 46      | 552     | 966     | 278      | 395      | 0                        | 0        | 5       | 0       | 0        | 0       |
| HE-2(143)      | 6                        | 29      | 21      | 37      | 98       | 10       | 14                       | 0        | 0       | 0       | 2        | 0       |
| pp65(138)      | 213                      | 565     | 509     | 86      | 437      | 136      | 0                        | 2        | 0       | 0       | 5        | 2       |
| UL28(92)       | 3                        | 91      | 6       | 274     | 13       | 208      | 0                        | 0        | 0       | 0       | 0        | 2       |
| UL32(260)      | 6                        | 928     | 202     | 32      | 152      | 40       | 3                        | 0        | 0       | 0       | 0        | 2       |
| UL36(117)      | 709                      | 77      | 10      | 374     | 139      | 50       | 2                        | 0        | 0       | 2       | 0        | 0       |
| UL40(53)       | 0                        | 2       | 10      | 30      | 8        | 3        | 0                        | 0        | 0       | 0       | 10       | 2       |
| UL48-sub1(229) | 3                        | 3       | 6       | 14      | 2        | 8        | 0                        | 0        | 0       | 0       | 0        | 0       |
| UL48-sub2(229) | 40                       | 6       | 14      | 45      | 10       | 2        | 2                        | 0        | 2       | 0       | 3        | 0       |
| UL55(224)      | 936                      | 42      | 923     | 931     | 651      | 19       | 2                        | 0        | 2       | 0       | 2        | 0       |
| UL82(137)      | 0                        | 83      | 81      | 189     | 2        | 2        | 0                        | 0        | 2       | 0       | 0        | 0       |
| UL94(84)       | 89                       | 0       | 21      | 997     | 290      | 8        | 0                        | 5        | 0       | 0       | 5        | 2       |
| UL99(45)       | 0                        | 0       | 61      | 27      | 6        | 10       | 0                        | 0        | 0       | 2       | 0        | 0       |
| UL103(60)      | 38                       | 38      | 21      | 32      | 2        | 10       | 2                        | 0        | 0       | 0       | 2        | 0       |
| UL151(82)      | 0                        | 0       | 22      | 14      | 0        | 2        | 0                        | 0        | 0       | 0       | 0        | 0       |
| UL153(67)      | 3                        | 14      | 54      | 27      | 10       | 8        | 0                        | 0        | 0       | 0       | 2        | 0       |
| US3(44)        | 0                        | 587     | 27      | 869     | 269      | 37       | 3                        | 0        | 0       | 0       | 0        | 0       |
| US24(123)      | 5                        | 0       | 19      | 461     | 5        | 5        | 0                        | 0        | 3       | 0       | 0        | 0       |
| US29(113)      | 2                        | 0       | 16      | 26      | 0        | 5        | 0                        | 0        | 0       | 0       | 5        | 0       |
| US32(43)       | 2                        | 0       | 51      | 42      | 5        | 10       | 0                        | 0        | 2       | 0       | 0        | 0       |
| CPI            | 481                      | 829     | 243     | 695     | 720      | 262      | 177                      | 337      | 322     | 221     | 415      | 266     |

Figure S4e

|                               | Donor ID | Medium | EBV antigens / peptide pools (No. of peptides) |               |                |               |                  |                |                |                 |                 |                 |                |              |               |     | CPI Pool |
|-------------------------------|----------|--------|------------------------------------------------|---------------|----------------|---------------|------------------|----------------|----------------|-----------------|-----------------|-----------------|----------------|--------------|---------------|-----|----------|
|                               |          |        | BMF1<br>(117)                                  | BMRF1<br>(99) | BRF1F<br>(149) | RZLF1<br>(59) | EBNA LP<br>(124) | EBNA1<br>(158) | EBNA2<br>(119) | EBNA3a<br>(234) | EBNA3b<br>(279) | EBNA3c<br>(265) | GP350<br>(224) | LMP1<br>(94) | LMP2<br>(122) |     |          |
| EBV<br>seropositive<br>donors | Donor 1  | 1      | 1                                              | 3             | 1              | 1             | 53               | 141            | 8              | 5               | 19              | 161             | 7              | 0            | 3             | 829 |          |
|                               | Donor 11 | 0      | 13                                             | 3             | 128            | 11            | 1                | 23             | 108            | 13              | 13              | 11              | 7              | 3            | 0             | 262 |          |
|                               | Donor 15 | 1      | 33                                             | 189           | 47             | 683           | 72               | 477            | 207            | 65              | 223             | 93              | 24             | 5            | 23            | 874 |          |
|                               | Donor 2  | 0      | 1                                              | 0             | 11             | 207           | 53               | 81             | 17             | 247             | 13              | 3               | 57             | 0            | 0             | 231 |          |
|                               | Donor 18 | 1      | 7                                              | 1             | 0              | 35            | 0                | 3              | 0              | 173             | 3               | 5               | 4              | 0            | 1             | 221 |          |
|                               | Donor 25 | 0      | 9                                              | 25            | 113            | 5             | 8                | 125            | 75             | 7               | 3               | 93              | 15             | 4            | 231           | 419 |          |
|                               | Donor 3  | 7      | 15                                             | 88            | 33             | 73            | 24               | 44             | 80             | 8               | 73              | 19              | 1              | 0            | 12            | 112 |          |
|                               | Donor 7  | 7      | 16                                             | 24            | 51             | 97            | 85               | 80             | 713            | 48              | 21              | 21              | 27             | 5            | 49            | 695 |          |
| EBV<br>seronegative<br>donors | Donor 9  | 0      | 8                                              | 24            | 89             | 12            | 11               | 56             | 97             | 80              | 29              | 44              | 12             | 0            | 144           | 266 |          |
|                               | Donor 16 | 3      | 0                                              | 4             | 4              | 0             | 7                | 5              | 0              | 0               | 3               | 1               | 0              | 1            | 3             | 197 |          |
|                               | Donor 19 | 16     | 0                                              | 5             | 5              | 0             | 1                | 9              | 11             | 0               | 0               | 3               | 0              | 1            | 3             | 177 |          |
|                               | Donor 20 | 1      | 5                                              | 4             | 9              | 1             | 3                | 5              | 0              | 0               | 5               | 9               | 1              | 0            | 0             | 601 |          |
|                               | Donor 21 | 4      | 5                                              | 7             | 0              | 1             | 4                | 0              | 5              | 0               | 3               | 0               | 3              | 3            | 3             | 415 |          |
|                               | Donor 30 | 1      | 4                                              | 0             | 0              | 1             | 12               | 1              | 15             | 8               | 1               | 11              | 0              | 0            | 0             | 293 |          |
|                               |          |        |                                                |               |                |               |                  |                |                |                 |                 |                 |                |              |               |     |          |

Figure S4f

| ID.                          | ORF3a | N     | Nsp12 | Nsp5  | S (A & B) | S-RBD | M     |
|------------------------------|-------|-------|-------|-------|-----------|-------|-------|
| dC1                          | 10%   | 12%   | 13%   | 0%    | 40%       | 7%    | 16%   |
| dC2                          | 12%   | 25%   | 12%   | 0%    | 40%       | 2%    | 10%   |
| dC3                          | 10%   | 13%   | 3%    | 5%    | 50%       | 10%   | 10%   |
| dC4                          | 3%    | 21%   | 6%    | 3%    | 47%       | 7%    | 13%   |
| dC5                          | 1%    | 16%   | 0%    | 2%    | 49%       | 23%   | 9%    |
| dC6                          | 5%    | 31%   | 11%   | 2%    | 35%       | 4%    | 14%   |
| dC7                          | 12%   | 10%   | 9%    | 1%    | 51%       | 3%    | 15%   |
| dC8                          | 6%    | 21%   | 17%   | 1%    | 31%       | 16%   | 7%    |
| dC9                          | 0%    | 19%   | 0%    | 0%    | 24%       | 8%    | 49%   |
| $\bar{x}$                    | 6%    | 18%   | 8%    | 2%    | 40%       | 9%    | 16%   |
| $\sigma$                     | 4%    | 6%    | 6%    | 3%    | 9%        | 6%    | 12%   |
| # Pept.                      | 66    | 102   | 231   | 74    | 315       | 53    | 53    |
| $\bar{x}/(\# \text{ Pept.})$ | 0.09% | 0.18% | 0.03% | 0.03% | 0.13%     | 0.17% | 0.30% |

Figure S4. IFN $\gamma$  ELISPOT response mapping data for 3 viruses

Responses to peptides spanning antigens for different viruses. Different categories of responses are defined using the scheme in Fig.3c. For HCMV a. overall results for pp65 from 10 healthy individuals. B. Comparison of results to predicted peptide to MHC binders. c. Summary of responses to peptide response categories. d. Summary of responses to peptides representing other HCMV antigens. e. Summary of responses to peptides representing EBV antigens. f. Summary of responses to peptides representing antigens of SARS-CoV-2 (14,15).

Figure S5a

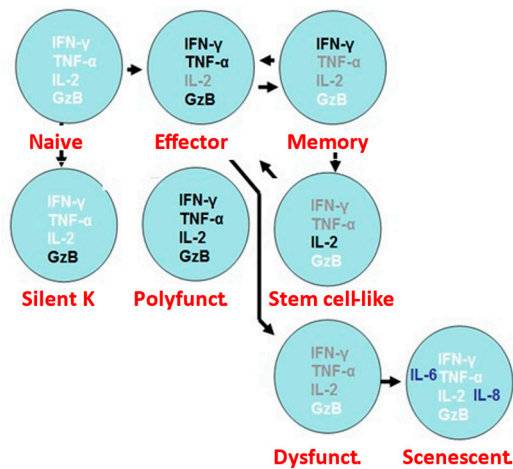

Figure S5. Quality of T cell responses

Schematic of the classification of T cell responses based on their secretion of single or multiple



cytokines in response to antigens using the FluoroSpot assay. T cell response phenotypes are described here as: naïve, effector, memory, silent killer (K), polyfunctional, stem cell-like, dysfunctional and senescent (16).

Figure S6

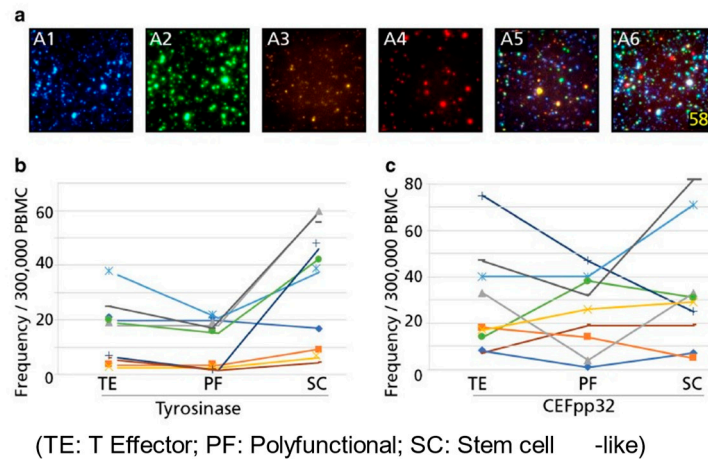

#### Figure S6. Anti-melanoma T cell qualitative data

a.Examples of FluroSpot responses as single and multi-colour, representing secretion of IFN $\gamma$  (green A2), IL-2 (red A4), TNF $\alpha$  (yellow A3) and Granzyme B (blue A1), b.The relationship between frequencies of responses against Tyrosinase, c. The relationship between frequencies of responses against positive control peptides (CMV, EBV, 'flu). Each line represents a different individual. (17).
